# Supplementary material for: Investigation of cation binding and sensing by new crown ether core substituted naphthalene diimide systems
Source: Royal Society of Chemistry journal article supplement (doi:10.1039/c8nj05666h), 2019-01-01
Supplement: c8nj05666h1.pdf [file c8nj05666h1.pdf]

Supplementary Material

## Investigation of Cation Binding and Sensing by new Crown Ether core substituted Naphthalene Diimide systems

R. P. Cox,<sup>a</sup> S. Sandanayake<sup>a,b</sup> D. L. A. Scarborough,<sup>a,c</sup> E. I. Izgorodina,<sup>a</sup> S. J. Langford<sup>a,d</sup> and T. D. M. Bell<sup>a</sup>

<sup>a</sup> School of Chemistry, Monash University, Wellington Road, Clayton, Victoria 3800, Australia.

<sup>b</sup> Addtec Pty Ltd, 264 George Street, Sydney, New South Wales 2000, Australia.

<sup>c</sup> School of Chemistry, The University of Sydney, Sydney, New South Wales 2006, Australia.

<sup>d</sup> Department of Chemistry and Biotechnology, Swinburne University, John Street, Hawthorn, Victoria 3122, Australia

### 1. Materials and Methods

Chemical shifts ( $\delta$ ) were calibrated against the solvent peak. For <sup>1</sup>H NMR spectra each resonance was assigned according to the following convention: chemical shift ( $\delta$ ) measured in parts per million (ppm), multiplicity, coupling constant ( $J$ ), number of protons and assignment. Multiplicities are denoted as (s) singlet, (d) doublet, (t) triplet, (q) quartet, (p) pentet, or (m) multiplet. For <sup>13</sup>C NMR each resonance was assigned according to the following convention: chemical shift ( $\delta$ ) measured in parts per million (ppm) and assignment (where known).

### 2. Characterisation

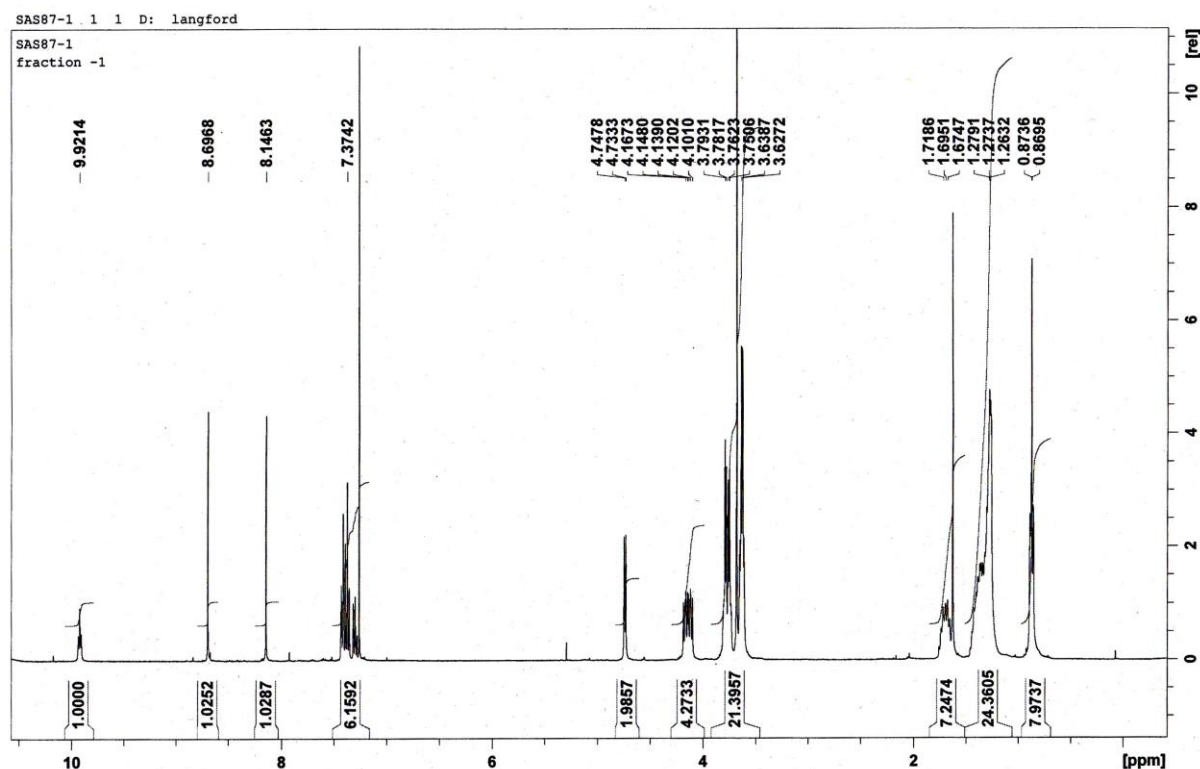

Fig. S1 <sup>1</sup>H NMR spectrum of **5** (300 MHz, 303 K) in CDCl<sub>3</sub>.

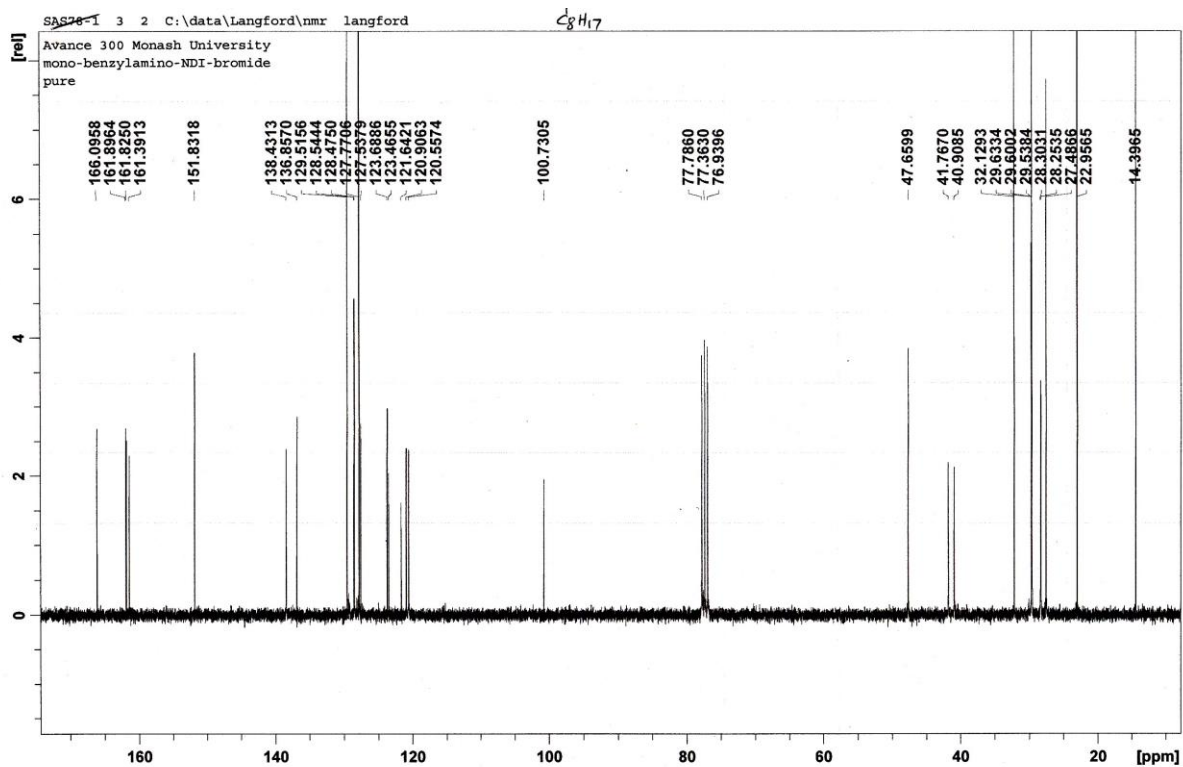

Fig. S2  $^{13}C$  NMR spectrum of **5** (75 MHz, 303 K) in  $CDCl_3$ .

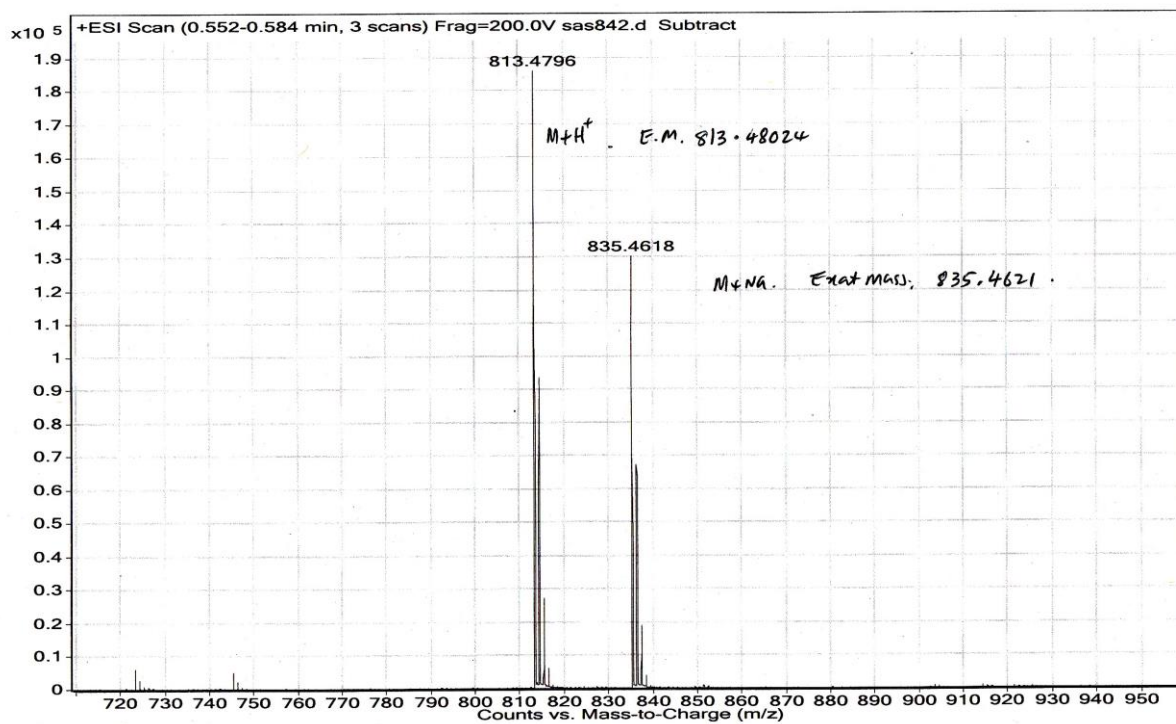

Fig. S3 High resolution mass spectrum (ESI<sup>+</sup>) of **5**.

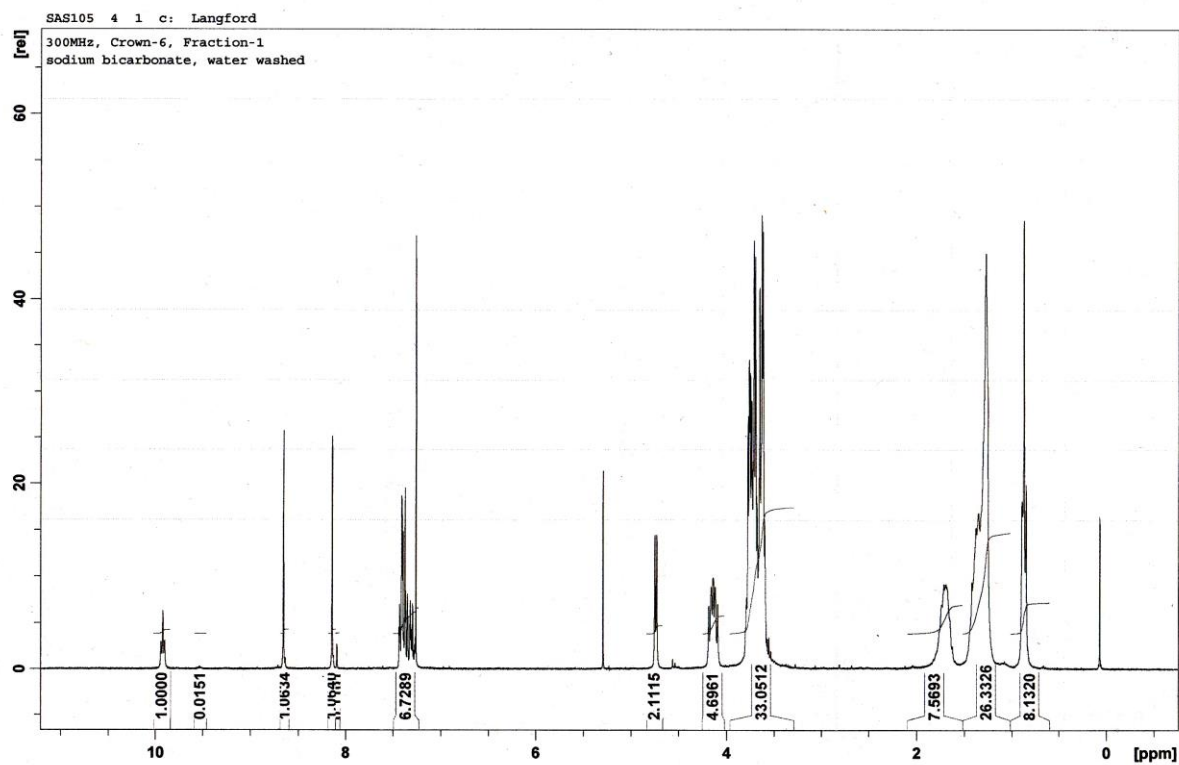

Fig. S4  $^1\text{H}$  NMR spectrum of **6** (300 MHz, 303 K) in  $\text{CDCl}_3$ .

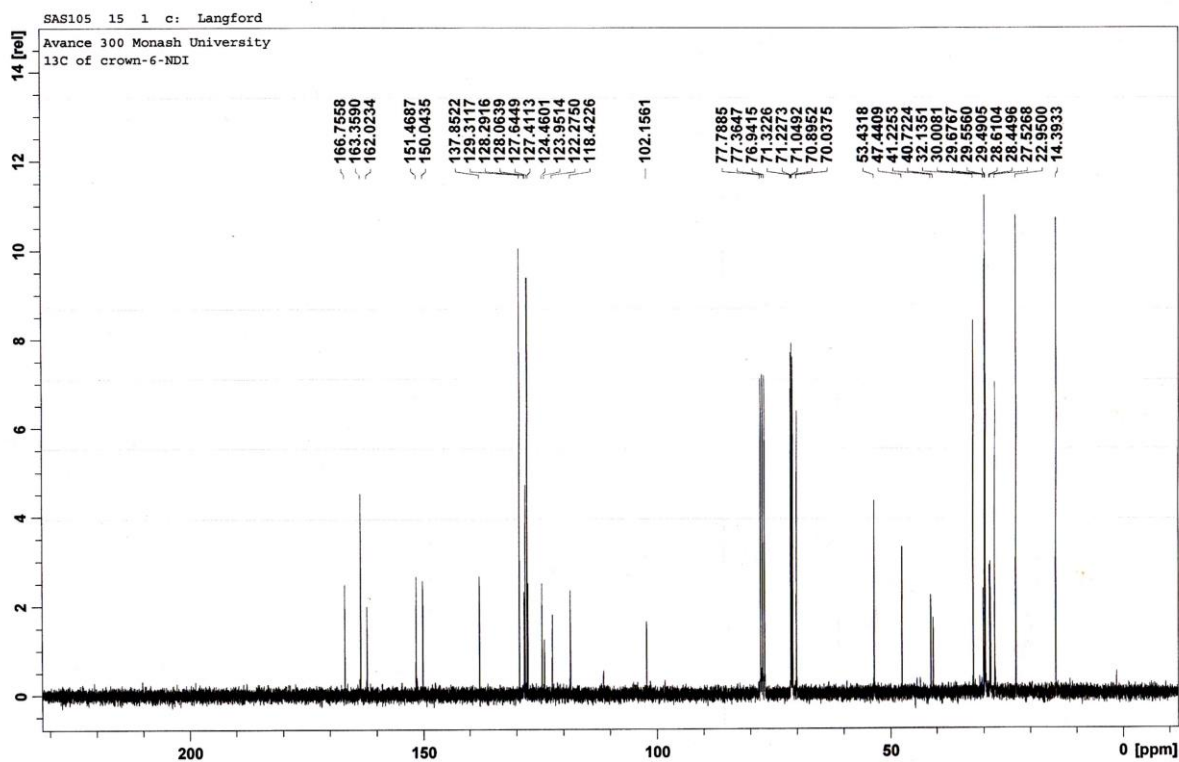

Fig. S5  $^{13}\text{C}$  NMR spectrum of **6** (75 MHz, 303 K) in  $\text{CDCl}_3$ .

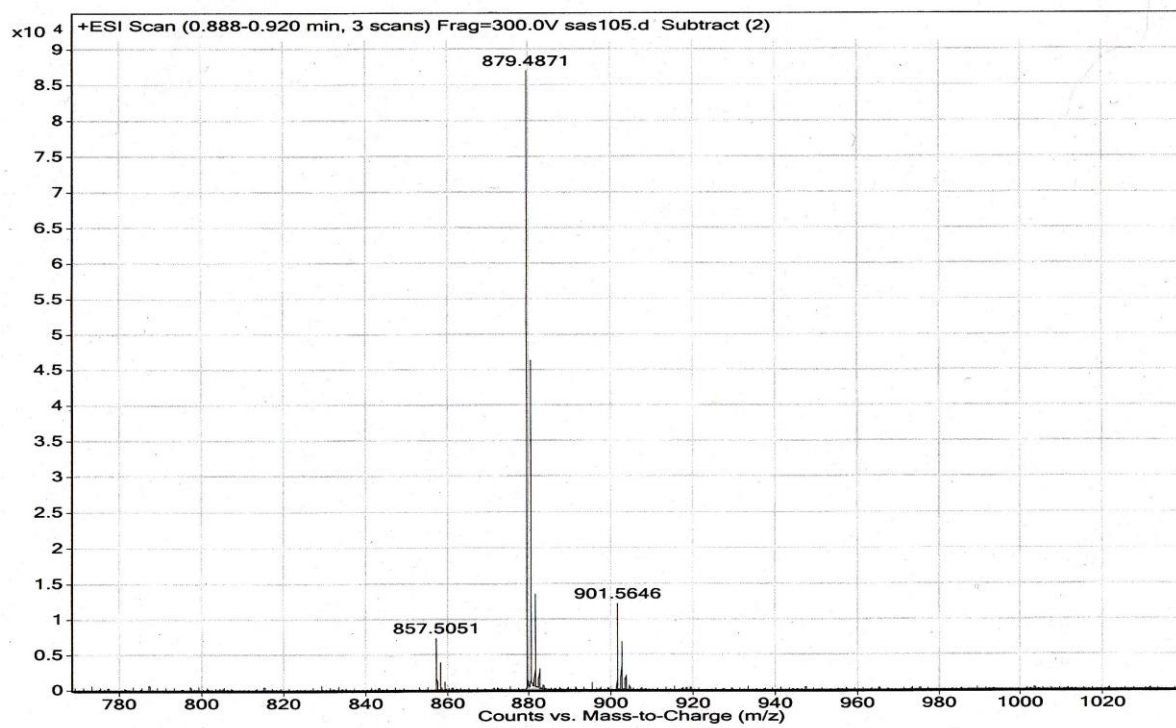

**Fig. S6** High resolution mass spectrum (ESI<sup>+</sup>) of **6**.

### 3. Spectroscopic Materials and Methods

For molar absorptivity coefficient determination, 10 ml standards of concentrations ranging from 0 to 100  $\mu\text{mol L}^{-1}$  were prepared in ethanol in 1.0 cm pathlength quartz cuvettes. The molar extinction coefficients were determined at the absorption maximum of 600 nm and found to be 12,500  $\text{M}^{-1}\text{cm}^{-1}$  and 13,900  $\text{M}^{-1}\text{cm}^{-1}$  for sensors **5** and **6**, respectively. Samples for determination of binding via a Job's plot were prepared for concentrations of **6** from 0 to 10  $\mu\text{mol L}^{-1}$  every 0.5  $\mu\text{M}$  with a constant total molar concentration of **6** + salt of 10  $\mu\text{mol L}^{-1}$ . Stability constants were determined using the method of Bourson and Valeur (J. Phys. Chem., 1989, 3871-3876). Fluorescence quantum yields were determined by comparing areas under corrected emission spectra recorded under identical conditions with that of Rhodamine 101 which has a quantum yield of 1.0 in ethanol. (T. Karstens and K. Kobs, J. Phys. Chem., 1980, 84, 1871.)

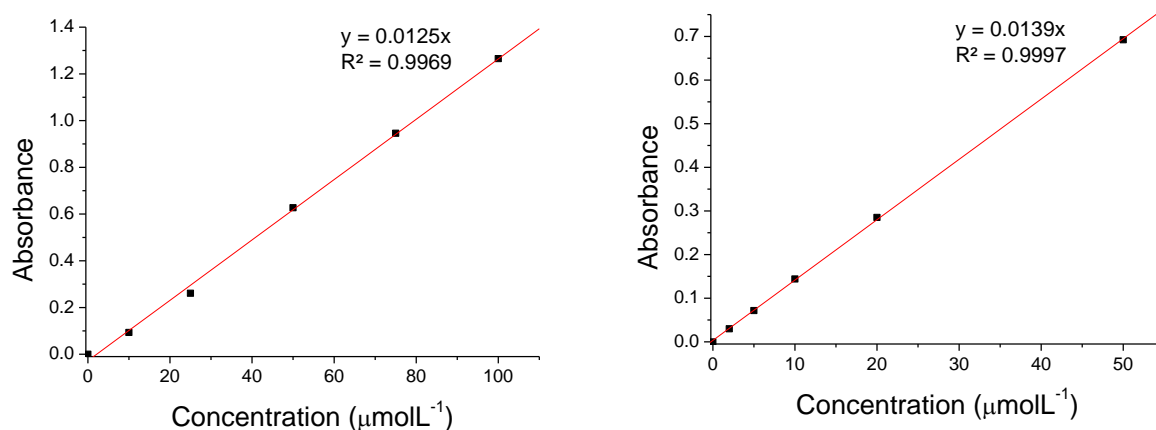

**Fig. S7** Concentration versus absorbance of **5** (left) and **6** (right) in EtOH at 600 nm.

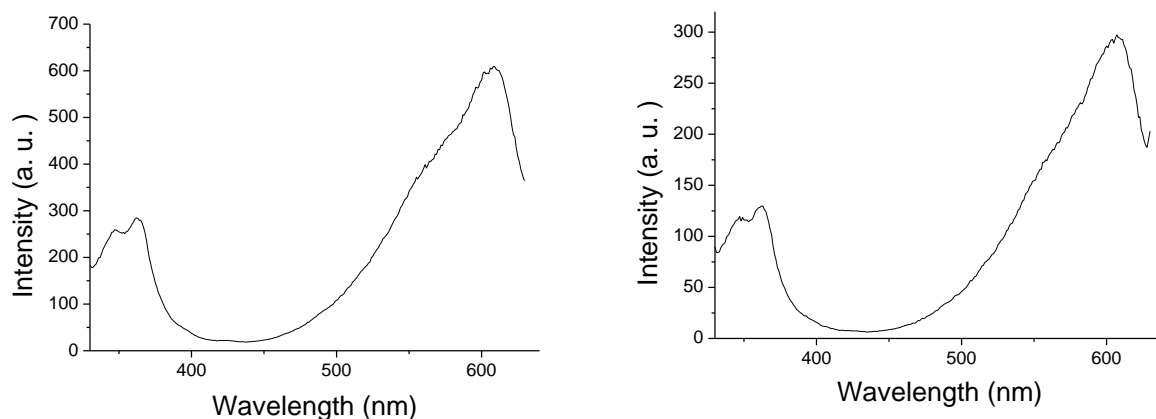

**Fig. S8** Excitation spectra of **5** (left) and **6** (right) in EtOH. Emission monitored at 640 nm.

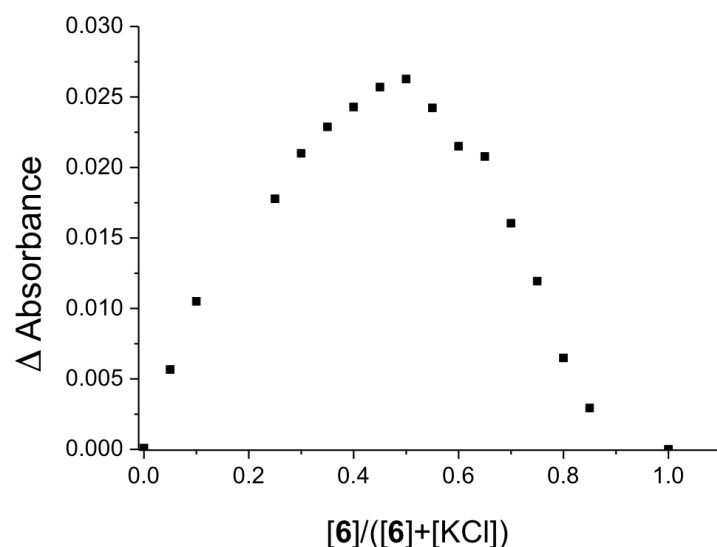

**Fig. S9** Job's plot determined over a range from 0-10  $\mu\text{mol L}^{-1}$  for **6** with a constant concentration of **6** + KCl = 10  $\mu\text{mol L}^{-1}$ . Maximum  $\Delta\text{Absorbance}$  occurs at  $\sim 0.50$  mole fraction of **6** indicating 1:1 binding between **6** and  $\text{K}^+$ .  $\Delta\text{Absorbance}$  = measured absorbance – calculated absorbance where the calculated absorbance is  $[\text{6}/([\text{6}+\text{KCl})]$  multiplied by the measured absorbance of the 10  $\mu\text{mol L}^{-1}$  solution of **6**. The absorbance was taken over the range 590 – 610 nm. KCl does not absorb over this range.

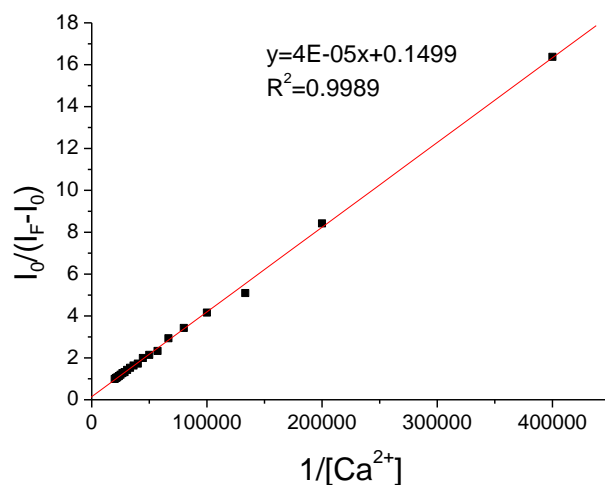

**Fig. S10** Determination of stability constant between **5** and  $\text{CaCl}_2$ .  $I_0/(I_F - I_0)$  versus  $1/[\text{CaCl}_2]$ . Stability constant is determined by the ratio intercept/slope = 3748  $\text{M}^{-1}$ .

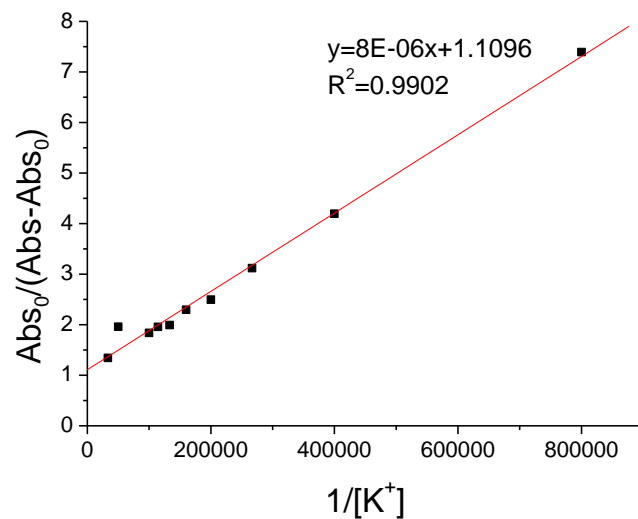

**Fig. S11** Determination of stability constant between **6** and KCl.  $Abs_0/(Abs-Abs_0)$  versus  $1/[KCl]$ . Stability constant is determined by the ratio intercept/slope =  $138700 M^{-1}$ .

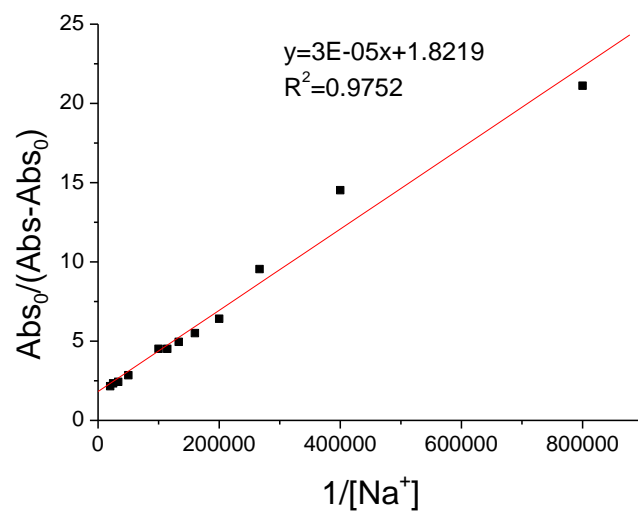

**Fig. S12** Determination of stability constant between **6** and NaCl.  $Abs_0/(Abs-Abs_0)$  versus  $1/[NaCl]$ . Stability constant is determined by the ratio intercept/slope =  $60730 M^{-1}$ .

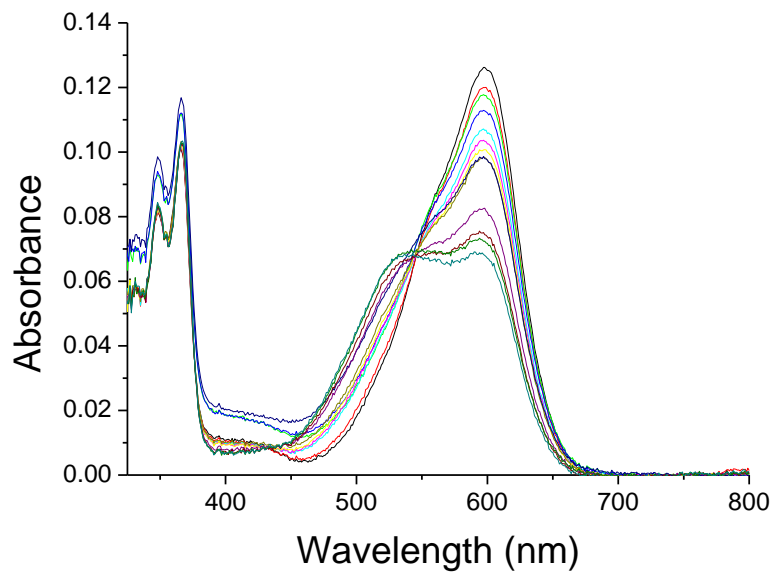

**Fig. S13** UV-Vis absorption spectra of **6** (10  $\mu\text{M}$ ) in EtOH on addition of 0-3 equiv. of  $\text{Na}^+$  (as NaCl).

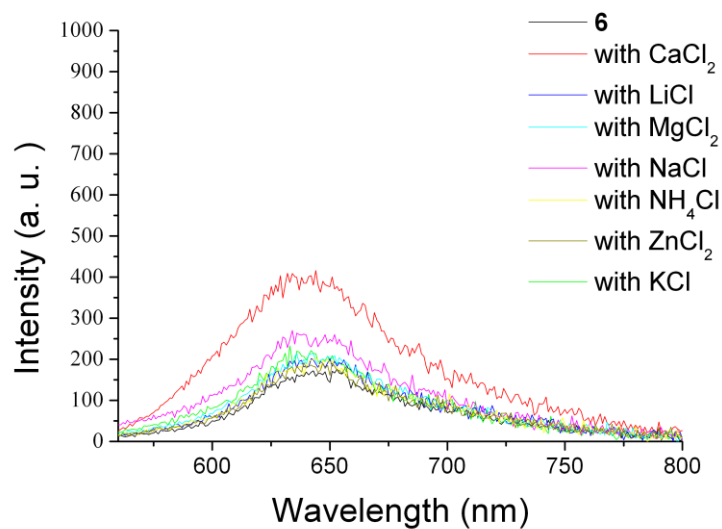

**Fig. S14** Fluorescence spectra of **6** (10  $\mu\text{M}$ ) in EtOH, on addition of chloride salts (50.0 equiv. of  $\text{Ca}^{2+}$ ,  $\text{Li}^+$ ,  $\text{Mg}^{2+}$ ,  $\text{Na}^+$ ,  $\text{NH}_4^+$ ,  $\text{Zn}^{2+}$  and  $\text{K}^+$ ). Excitation at 550 nm.



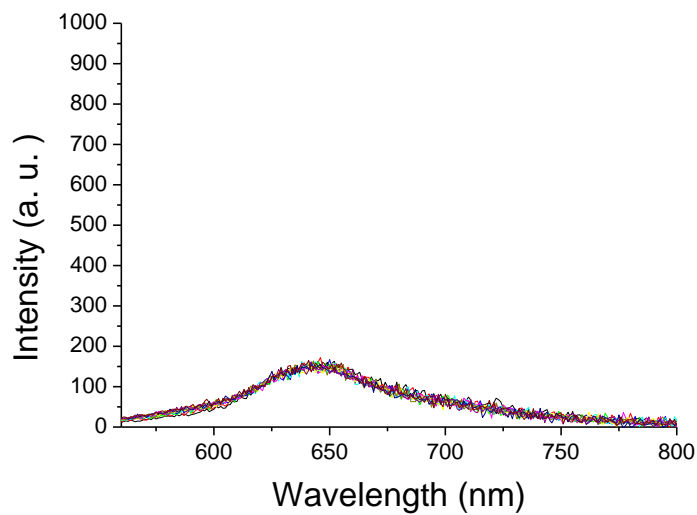

**Fig. S15** Fluorescence spectra of **6** (10  $\mu$ M) in EtOH on addition of 0-5 equiv. of K<sup>+</sup> (as KCl). Excitation at 550 nm.

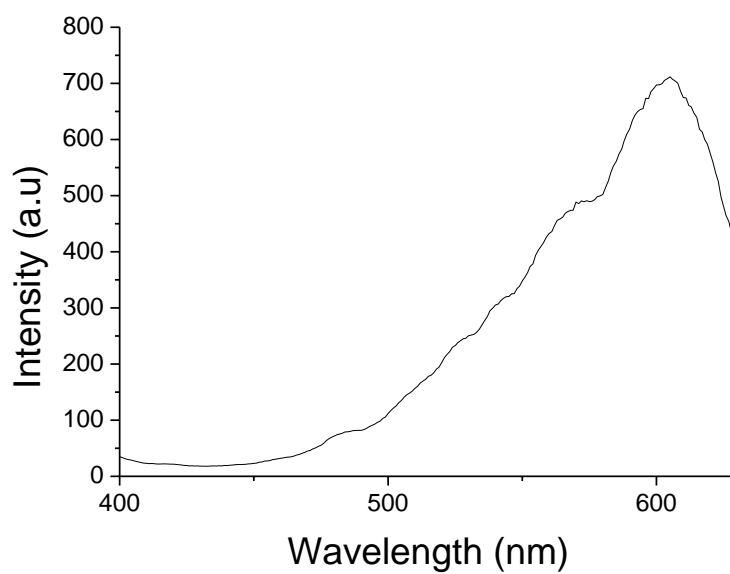

**Fig. S16** Excitation spectrum of **6-K<sup>+</sup>** in EtOH. Emission monitored at 640 nm.

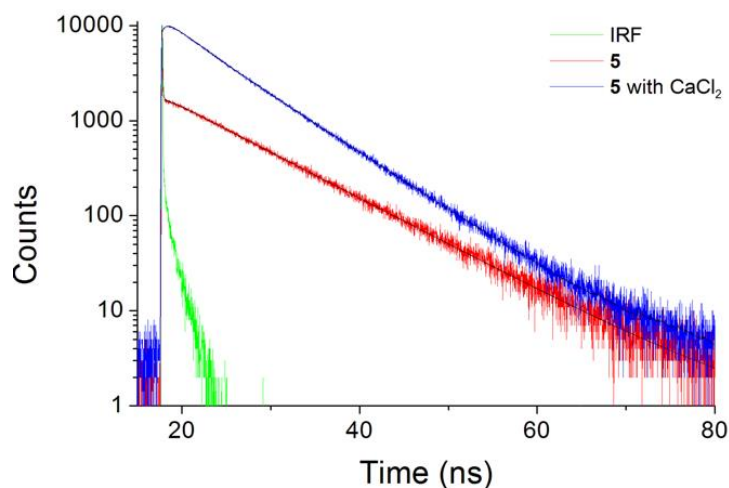

**Fig. S17** TCSPC decay profiles and fitted bi-exponential decay functions of **5** and **5** with  $\text{CaCl}_2$  ( $10 \mu\text{M}$  in EtOH). Excitation at 532 nm, IRF = instrument response function.

**Table S1.** Time resolved data for **5** and **5** with  $\text{CaCl}_2$  in EtOH.

|                          | $\tau_1$ (ns) | %  | $\tau_2$ (ns) | %  | $\chi^2$ |
|--------------------------|---------------|----|---------------|----|----------|
| <b>5</b>                 | 0.05          | 82 | 9.00          | 18 | 1.003    |
| <b>5-Ca<sup>2+</sup></b> | 2.53          | 23 | 7.19          | 77 | 1.084    |

**Table S2.** M06-2X TD-DFT absorbances for **5** and **6** in the bound and unbound states.

| Structure                       | Cation           | Unbound $\lambda_{\text{max}}$<br>(nm) | Bound $\lambda_{\text{max}}$<br>(nm) | $\Delta\lambda_{\text{max}}$ (nm) | Cation-NDI<br>interaction<br>energy<br>( $\text{kJ mol}^{-1} \text{z}^{-1}$ ) |
|---------------------------------|------------------|----------------------------------------|--------------------------------------|-----------------------------------|-------------------------------------------------------------------------------|
| <i>Higher energy structures</i> |                  |                                        |                                      |                                   |                                                                               |
| <b>5</b>                        | $\text{Ca}^{2+}$ | 500                                    | 463                                  | -37                               | -79.6                                                                         |
| <b>6</b>                        | $\text{Na}^+$    | 499                                    | 506                                  | 7                                 | -30.4                                                                         |
| <b>6</b>                        | $\text{K}^+$     | 483                                    | 482                                  | -1                                | -67.3                                                                         |

| Compound                | Orbital | Unbound                                                                             | Bound                                                                                |
|-------------------------|---------|-------------------------------------------------------------------------------------|--------------------------------------------------------------------------------------|
| 5 with Ca <sup>2+</sup> | LUMO    | 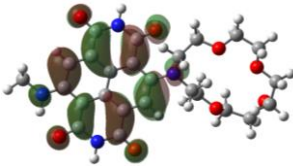   |    |
|                         | HOMO    |    |    |
| 6 with K <sup>+</sup>   | LUMO    |    |    |
|                         | HOMO    |  |  |
| 6 with Na <sup>+</sup>  | LUMO    |  |  |
|                         | HOMO    |  |  |

**Fig. S18** HOMOs and LUMOs calculated at HF/6-311++G(2d,2p) level of theory of **5** with Ca<sup>2+</sup> (upper panels), **6** with K<sup>+</sup> (centre panels) and **6** with Na<sup>+</sup> (lower panels)
